# Supplementary material for: SRF SUMOylation modulates smooth muscle phenotypic switch and vascular remodeling
Source: Research Square preprint supplement (doi:10.21203/rs.3.rs-2922216/v1), 2023-05-22
Supplement: Supplementary file 1 [file c84a872f051fa3bdf3364582.pdf]

## **SUPPLEMENTAL MATERIALS**

### **SRF SUMOylation modulates smooth muscle phenotypic switch and vascular remodeling**

Yue Xu, Haifeng Zhang, Jordan S. Pober, Wang Min, and Jenny Huanjiao Zhou

## SUPPLEMENTAL DATA

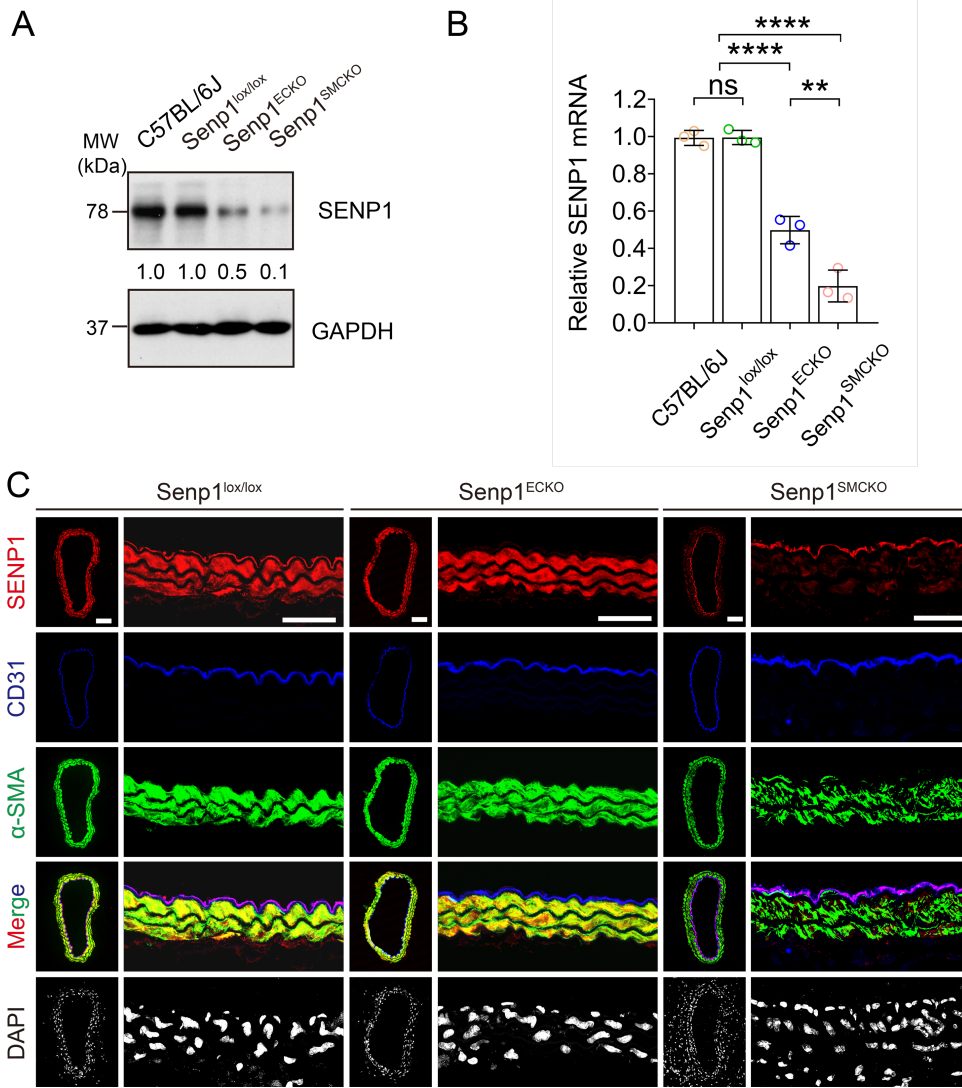

**Supplemental Fig. 1. Generation of VSMCs or ECs-specific Senp1 gene knockout mice.** **A.** The protein levels of Senp1 in the normal carotid arteries from C57BL/6, *Senp1*<sup>lox/lox</sup>, *Senp1*<sup>ECKO</sup> and *Senp1*<sup>SMCKO</sup> mice at age of 10-12 weeks (all in C57BL/6 background) were determined by western blot. GAPDH was served as a control. Relative protein levels are presented by taking C57BL/6 as 1.0 (n=3). **B.** The mRNA levels of Senp1 in the normal carotid arteries from C57BL/6, *Senp1*<sup>lox/lox</sup>, *Senp1*<sup>ECKO</sup> and *Senp1*<sup>SMCKO</sup> mice were determined by RT-PCR. GAPDH was served as a control. Relative mRNA levels are presented by taking C57BL/6 as 1.0 (n=3). Data are mean ± SEM. \*\*\*\* P < 0.0001. One-way ANOVA with Bonferroni post hoc analysis. **C.** Immunofluorescence triple staining of normal carotid arteries with specific antibodies against Senp1 (red), α-SMA (green) and CD31 (APC-conjugated and pseudo-colored by blue). Nuclei were stained with DAPI (pseudo-colored by white). Yellow indicates the co-localization of Senp1 with α-SMA, and purple indicates the co-localization of Senp1 with CD31 in the merged images. Scale bars, 50 μm.



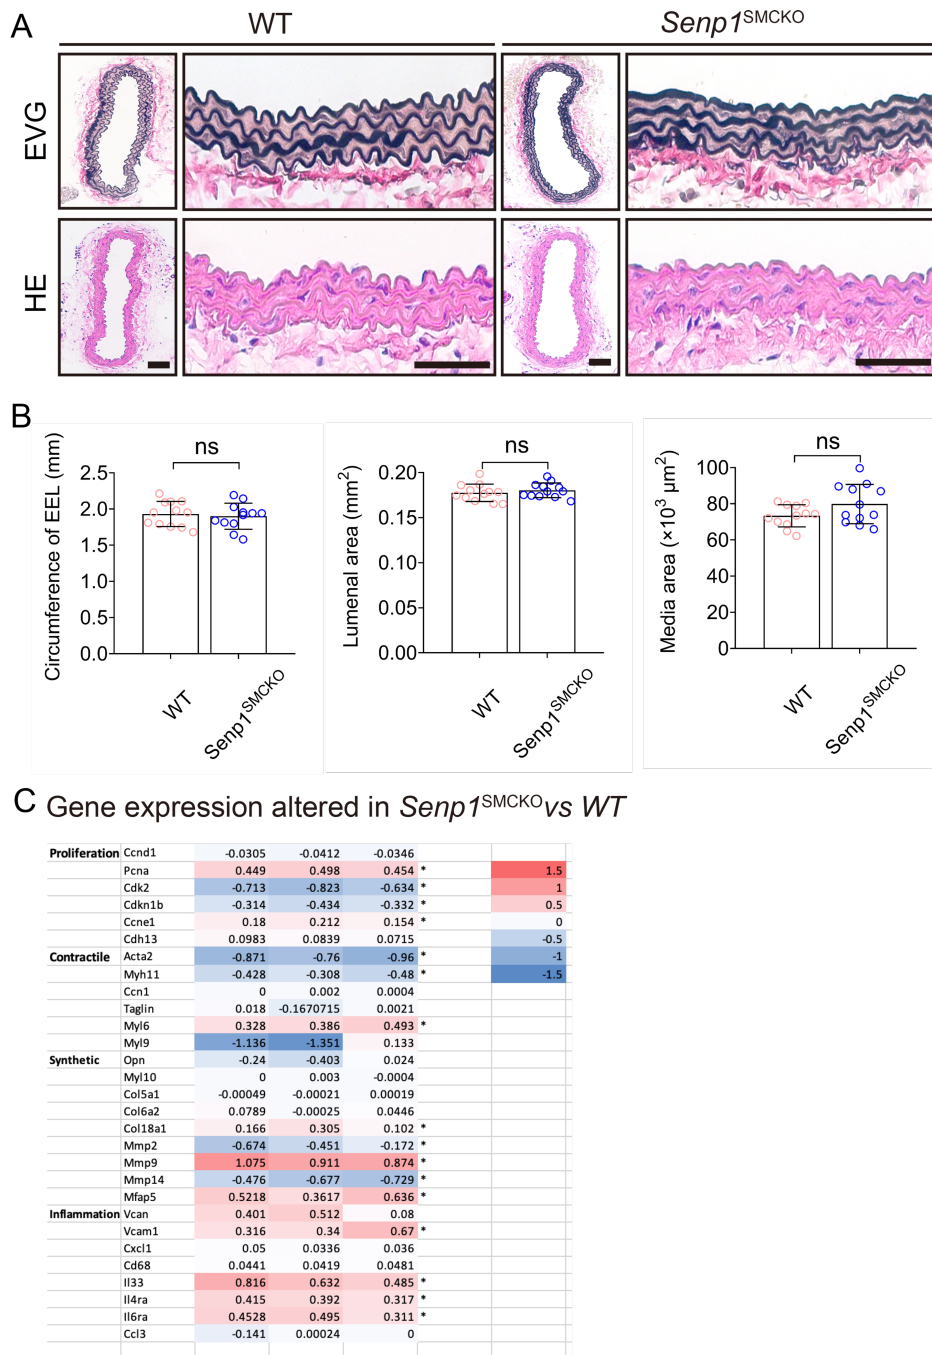

**Supplemental Fig. 2. The histological and morphometric features of carotid arteries between *Senp1*<sup>lox/lox</sup> (WT) and *Senp1*<sup>SMCKO</sup> mice in baseline conditions. A.** Representative photomicrographs of EVG staining and HE staining. **B.** The circumference of EEL, luminal area and media area in normal carotid arteries from WT and *Senp1*<sup>SMCKO</sup> mice at 10-12 weeks of age (n=12 per group). Data are mean ± SEM. ns, no significance, using two-tailed Student's t-test. EVG: elastic van gieson; HE: haematoxylin and eosin; EEL indicates external elastic lamina. Scale bars: 50 μm. **C.** Total RNAs were isolated from carotid arteries without injury and were subjected to RNA-sequencing analyses (n=3 per group). Heat map showing the gene expression of proliferation, contractile phenotype, synthetic phenotype, and inflammation in carotid arteries of WT and *Senp1*<sup>SMCKO</sup> mice. Asterisks indicate statistical significances (p<0.05) using two-tailed Student's t-test.

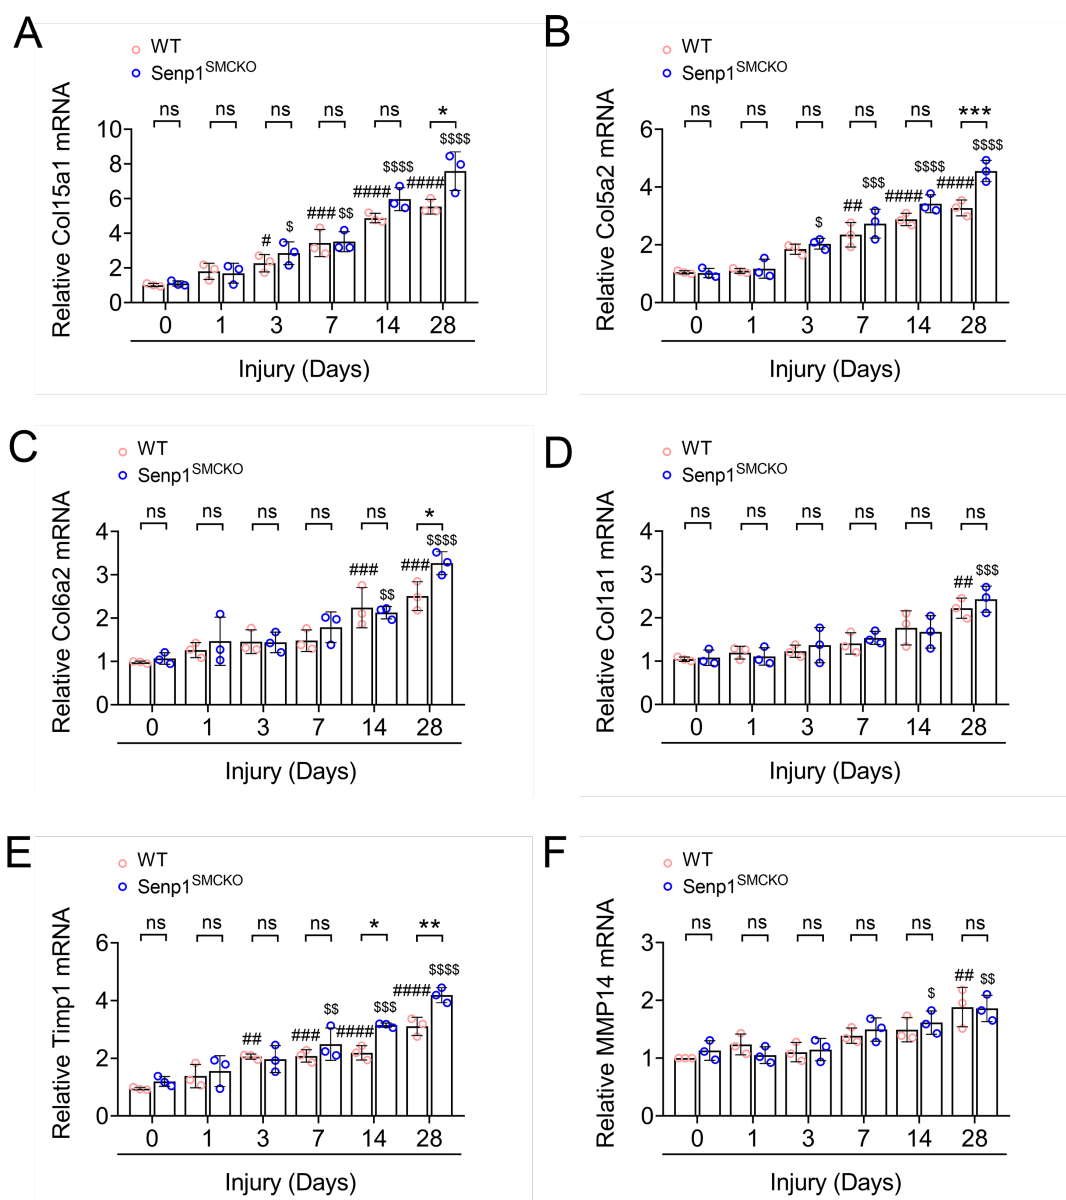

**Supplemental Fig. 3. *Senp1* deficiency in VSMCs increases multiple ECM-related genes expression during vascular remodeling.** *Senp1*<sup>lox/lox</sup> (WT) and *Senp1*<sup>SMCKO</sup> mice at age of 10-12 weeks were subjected to wire injury on left carotid arteries, and carotid arteries were harvested for analyses on day 3-28 post-injury as indicated. Non-injured mice were used as controls (time 0). Total RNAs were used for RT-PCR for mRNA levels of ECM-related genes. Gapdh as a control. Col15a1 (**A**), Col5a2 (**B**), Col6a2 (**C**), and Col1a1 (**D**), Timp1 (**E**) and Mmp14 (**F**). Data are mean  $\pm$  SEM. \*  $P < 0.05$ ; \*\*  $P < 0.01$ ; \*\*\*  $P < 0.001$ ; \*\*\*\*  $P < 0.0001$ ; ns, no significance, Two-tailed Student's t-test. #  $P < 0.05$ ; ##  $P < 0.01$ ; ###  $P < 0.001$ ; ####  $P < 0.0001$ , compared with un-injury WT mice; \$  $P < 0.05$ ; \$\$  $P < 0.01$ ; \$\$\$  $P < 0.001$ ; \$\$\$\$  $P < 0.0001$ , compared with un-injury *Senp1*<sup>SMCKO</sup> mice, using one-way ANOVA with Bonferroni post hoc analysis.

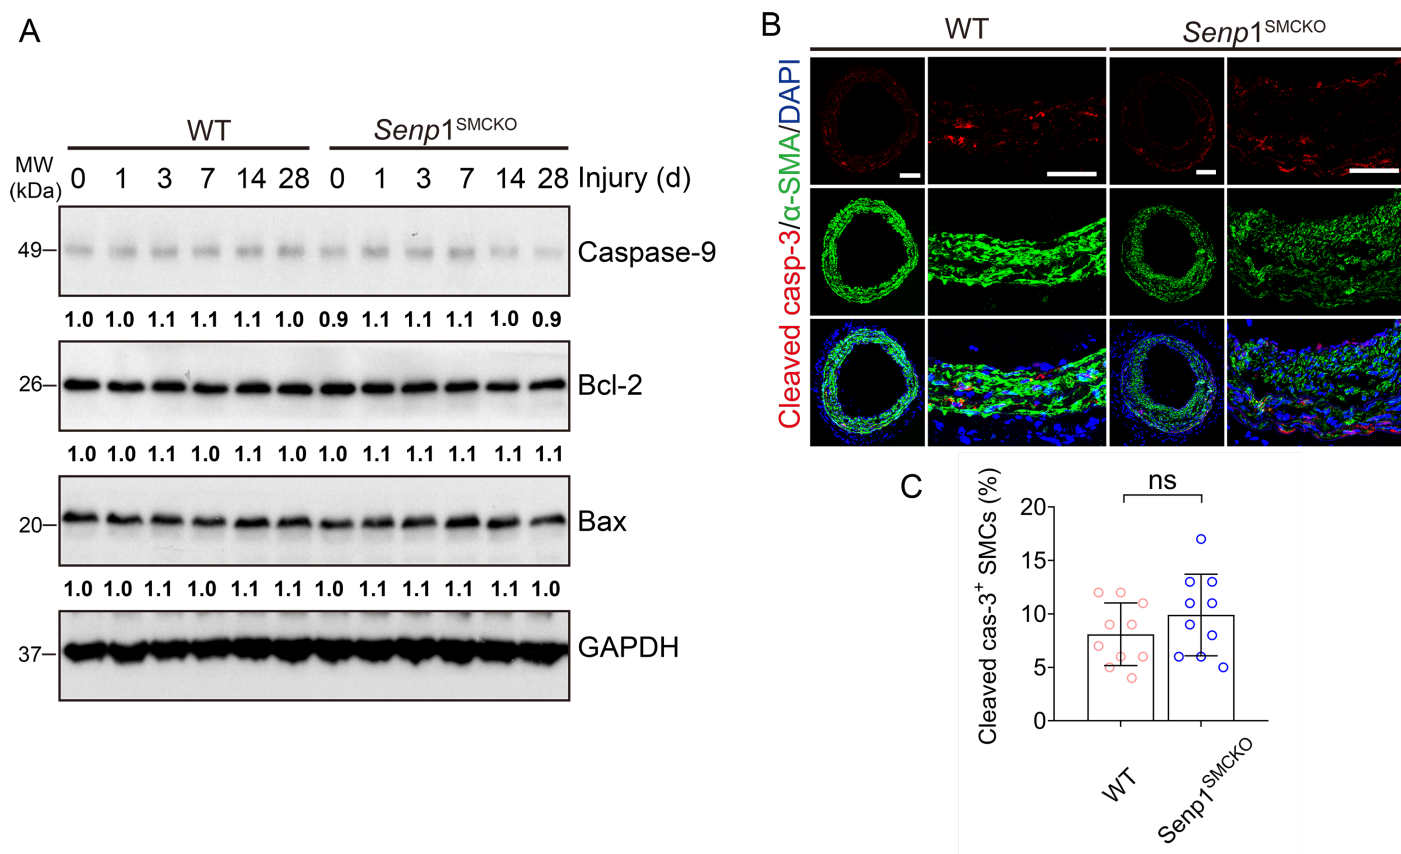

**Supplemental Fig. 4. *Senp1* deficiency in VSMCs does not affect apoptosis in neointima.** *Senp1*<sup>lox/lox</sup> (WT) and *Senp1*<sup>SMCKO</sup> mice at age of 10-12 weeks were subjected to wire injury on left carotid arteries, and carotid arteries were harvested for analyses on day 3-28 post-injury as indicated. Non-injured mice were used as controls (time 0). **A.** Western blots showing the protein levels of caspase-9, Bcl-2 and Bax in carotid arteries of WT and *Senp1*<sup>SMCKO</sup> mice (n=3 per group). GAPDH served as the control. Relative protein levels are presented by taking WT as 1.0 (n=3). **B.** Immunofluorescence double staining showing the expression and co-localization of cleaved caspase-3 (red) and  $\alpha$ -SMA (green) in neointima of WT and *Senp1*<sup>SMCKO</sup> mice at 28 days after wire injury. Nuclei were stained with DAPI (blue). Scale bars: 50 $\mu$ m. **C.** Quantitative analysis of the percentages of cleaved caspase-3-positive stained VSMCs. Data are mean  $\pm$  SEM (n=10 per group). ns, no significance, using two-tailed Student's t-test.

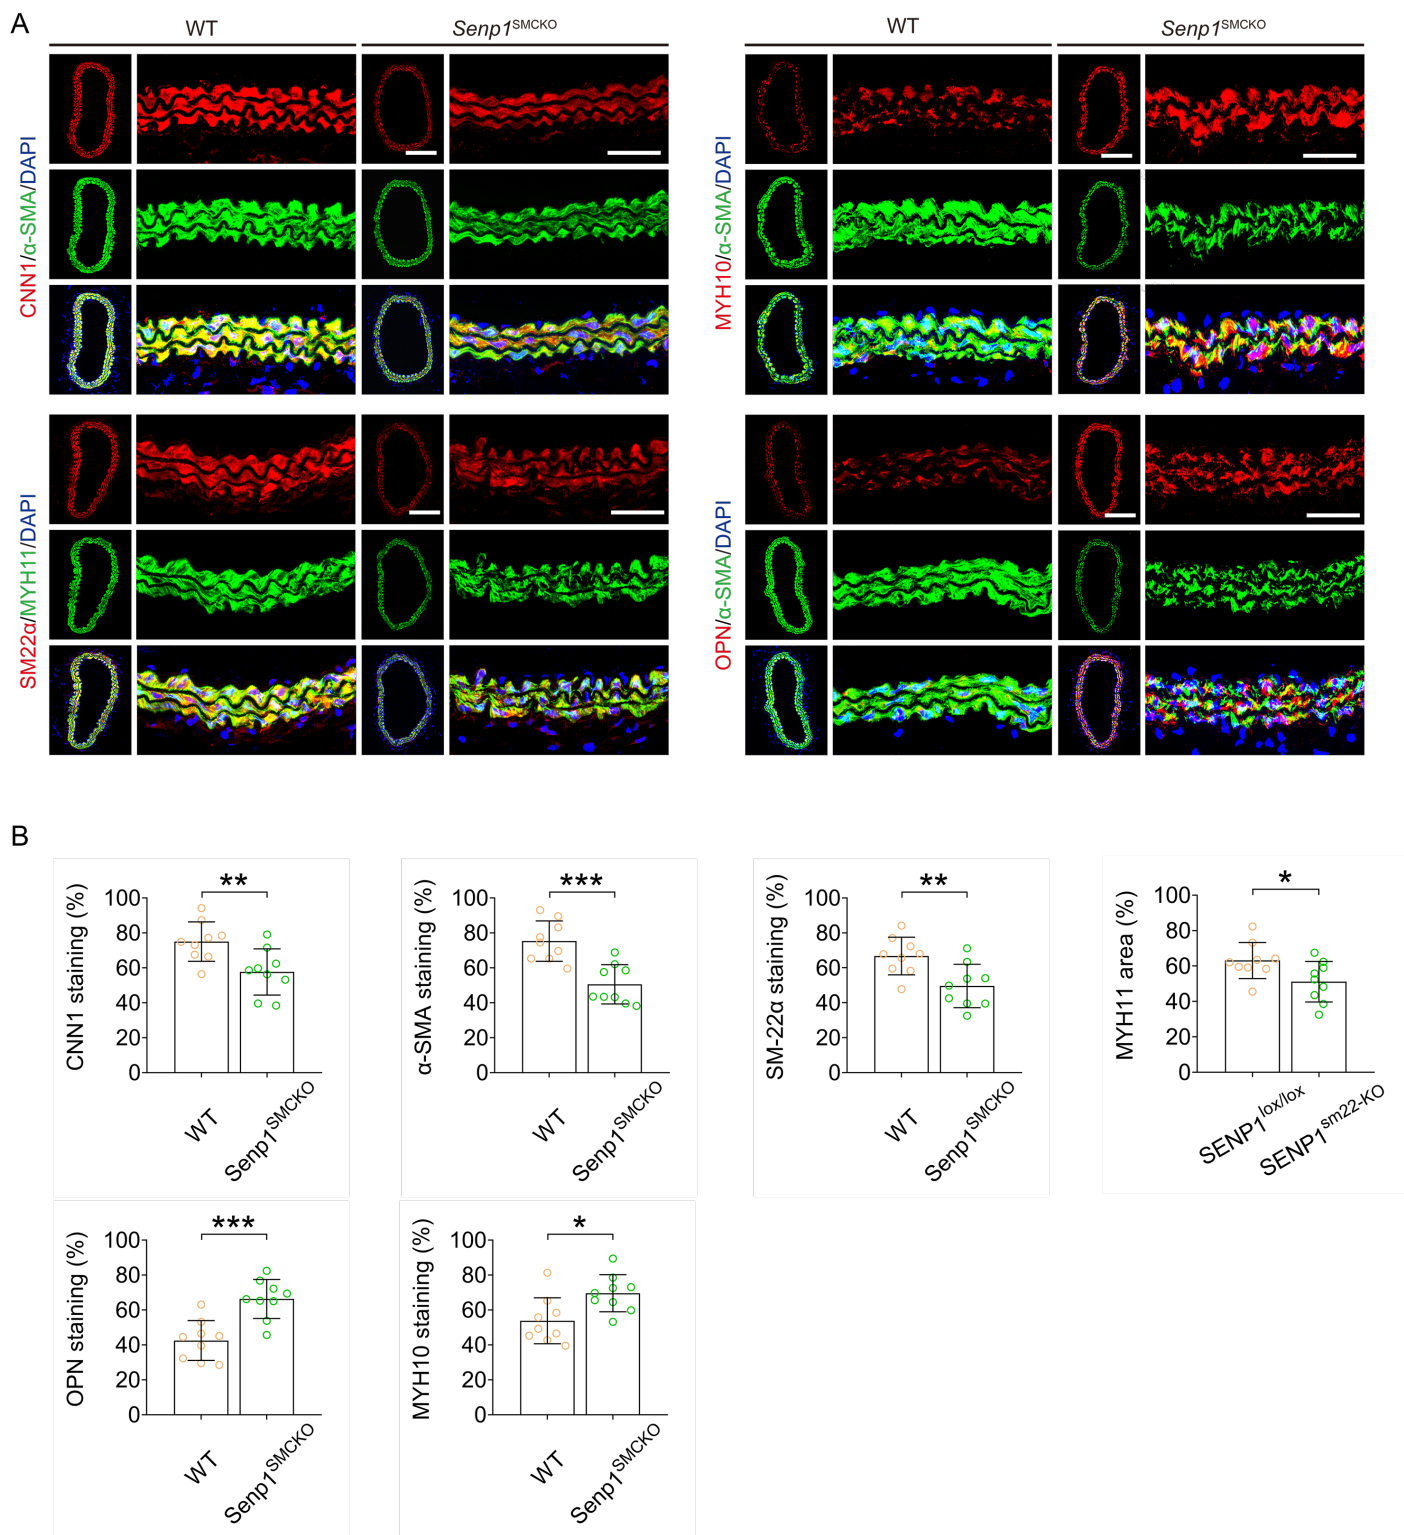

**Supplemental Fig. 5. *Senp1* deficiency in VSMCs weakly down-regulated basal levels of VSMC contractile markers.** **A.** Carotid arteries on day 0 were subjected to immunofluorescence co-staining of various contractile and synthetic markers as indicated with DAPI counterstaining for nuclei (blue). **B.** MFI of each marker within the media layer was quantified (n=10 per group). Data are mean  $\pm$  SEM. \*  $P < 0.05$ ; \*\*  $P < 0.01$ ; \*\*\*  $P < 0.001$ ; \*\*\*\*  $P < 0.0001$ ; ns, no significance. Two-tailed Student's t-test. MFI: mean fluorescence intensity.



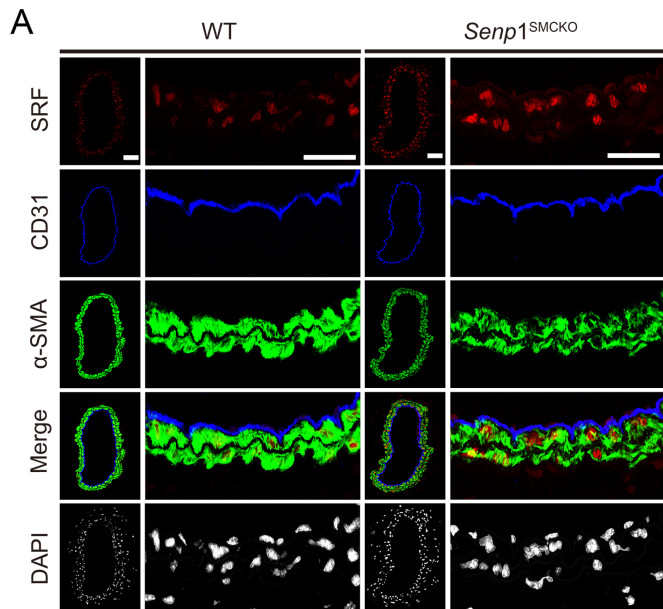

**B**

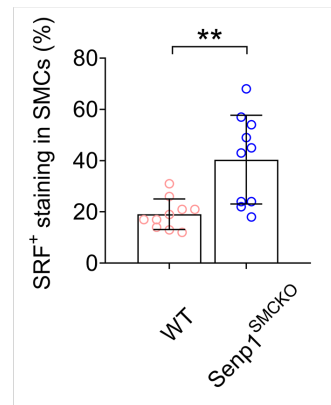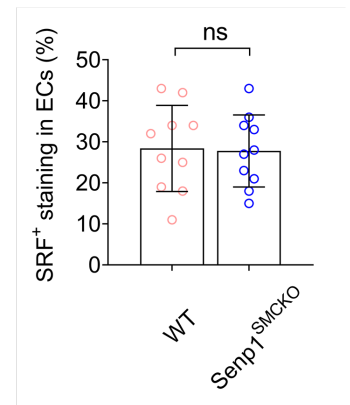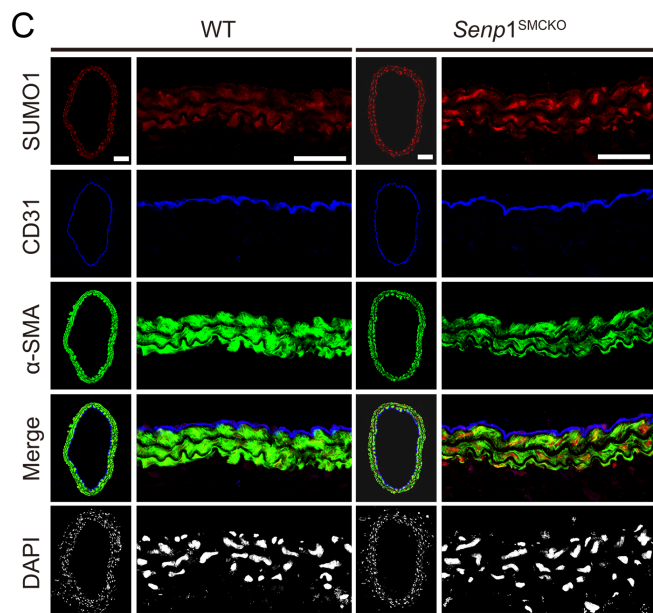

**D**

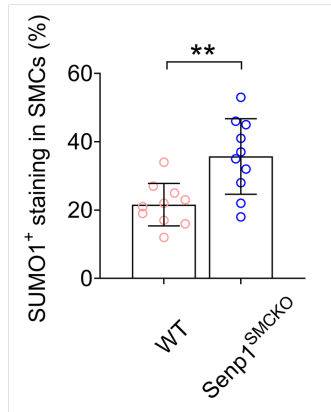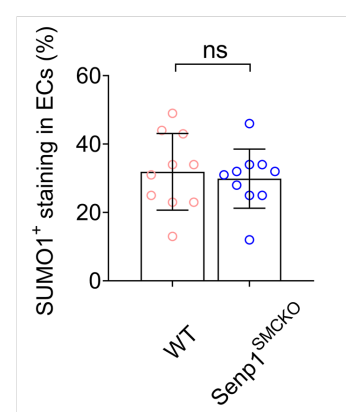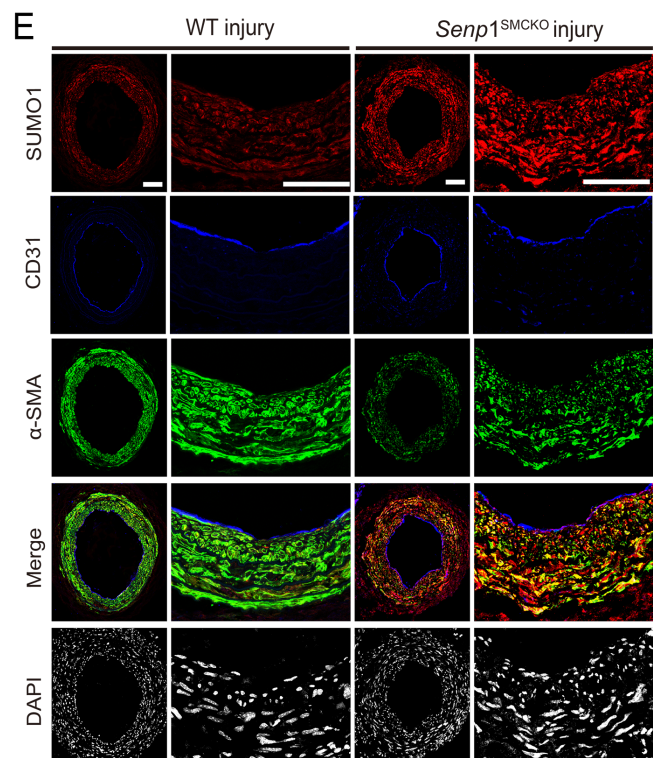

**F**

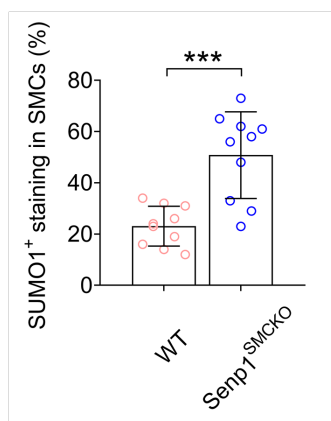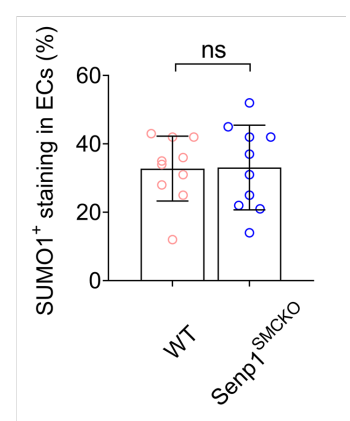

**Supplemental Fig. 6. The expressions of SRF and SUMO1 in carotid arteries between *Senp1*<sup>lox/lox</sup> (WT) and *Senp1*<sup>SMCKO</sup> mice.** **A-B.** Immunofluorescence staining for SRF in carotid arteries from WT and *Senp1*<sup>SMCKO</sup> mice on day 0. **(A)** Four color images are presented with SRF (red),  $\alpha$ -SMA (green), CD31 (APC; pseudo-colored by blue) and DAPI (blue; pseudo-colored by white). **(B)** MFI of SRF within the media layer or ECs was quantified (n=10 per group). **C-D.** Immunofluorescence staining for SUMO1 in carotid arteries from WT and *Senp1*<sup>SMCKO</sup> mice on day 0. **(C)** Four color images are presented with SUMO1 (red),  $\alpha$ -SMA (green), CD31 (APC; pseudo-colored by blue) and DAPI (blue; pseudo-colored by white). **(D)** MFI of SUMO1 within the media layer or ECs was quantified (n=10 per group). **E-F.** Immunofluorescence staining for SUMO1 in carotid arteries from WT and *Senp1*<sup>SMCKO</sup> mice on day 28 post-injury. **(E)** Four color images are presented with SUMO1 (red),  $\alpha$ -SMA (green), CD31 (APC; pseudo-colored by blue) and DAPI (blue; pseudo-colored by white). **(F)** MFI of SUMO1 within the neointimal areas and ECs were quantified (n =10 per group). Data are mean  $\pm$  SEM. \*\* P < 0.01. Two-tailed Student's t-test. Scale bars, 50 $\mu$ m (left) and 20 $\mu$ m (right). MFI: mean fluorescence intensity.

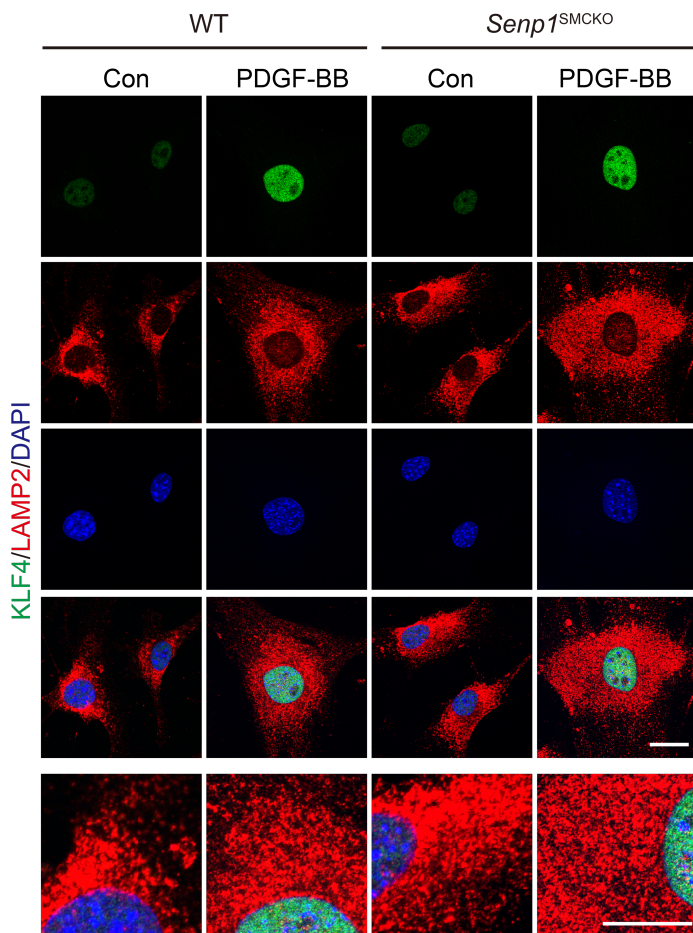

**Supplemental Fig. 7. SENP1 deletion has no effect on KLF4 cellular localization. A-B.** VSMCs Isolated from un-injured WT and *Senp1*<sup>SMCKO</sup> mice were treated with PDGF-BB for 24 h. Cells were subjected to immunofluorescence co-staining with KLF4 and LAMP2. High magnification of merged images is shown at the bottom of each panel. Lysosomal and nuclear KLF4 are indicated by arrows and arrowheads, respectively.

 Motifs with high probability  
 Motifs with low probability

Homo sapiens 129 GA VSG**AKPG**KKT RGRVK**IKME**F IDNKLRRYTT FSK**RKTG**IMK KAY 173  
 Mus musculus 125 GA VSG**AKPG**KKT RGRVK**IKME**F IDNKLRRYTT FSK**RKTG**IMK KAY 169  
 Rattus norvegicus 125 GA VSG**AKPG**KKT RGRVK**IKME**F IDNKLRRYTT FSK**RKTG**IMK KAY 169  
 Canis lupus familiaris 129 GA VSG**AKPG**KKT RGRVK**IKME**F IDNKLRRYTT FSK**RKTG**IMK KAY 173  
 Gallus gallus 69 GE RRG**LKRG**LAE AA.....GAVSG **AKPG**KKTRGR VK**IKME**FIDN KLR 140  
 143 .....TT FSK**RKTG**IMK KAYELS.....SGSSLTELQV VNLDTSHN**AK SD** 492

| Homo sapiens |      |                         |       |
|--------------|------|-------------------------|-------|
| NO.          | Pos. | Group                   | Score |
| 1            | K147 | RGRVK <b>IKME</b> FIDNK | 0.94  |
| 2            | K135 | GAVSG <b>AKPG</b> KKT   | 0.62  |
| 3            | K165 | TTFSK <b>RKTG</b> IMKKA | 0.27  |

| Canis lupus familiaris |      |                         |       |
|------------------------|------|-------------------------|-------|
| NO.                    | Pos. | Group                   | Score |
| 1                      | K147 | RGRVK <b>IKME</b> FIDNK | 0.94  |
| 2                      | K135 | GAVSG <b>AKPG</b> KKT   | 0.62  |
| 3                      | K165 | TTFSK <b>RKTG</b> IMKKA | 0.27  |

| Mus musculus |      |                         |       |
|--------------|------|-------------------------|-------|
| NO.          | Pos. | Group                   | Score |
| 1            | K143 | RGRVK <b>IKME</b> FIDNK | 0.94  |
| 2            | K131 | GAVSG <b>AKPG</b> KKTRG | 0.62  |
| 3            | K161 | TTFSK <b>RKTG</b> IMKKA | 0.27  |

| Gallus gallus |      |                         |       |
|---------------|------|-------------------------|-------|
| NO.           | Pos. | Group                   | Score |
| 1             | K131 | RGRVK <b>IKME</b> FIDNK | 0.94  |
| 2             | K490 | DTSHN <b>AKSD</b>       | 0.79  |
| 3             | K75  | GERRG <b>LKRG</b> LAEAA | 0.73  |
| 2             | K119 | GAVSG <b>AKPG</b> KKTRG | 0.62  |
| 3             | K149 | TTFSK <b>RKTG</b> IMKKA | 0.27  |

| Rattus norvegicus |      |                         |       |
|-------------------|------|-------------------------|-------|
| NO.               | Pos. | Group                   | Score |
| 1                 | K143 | RGRVK <b>IKME</b> FIDNK | 0.94  |
| 2                 | K131 | GAVSG <b>AKPG</b> KKTRG | 0.62  |
| 3                 | K161 | TTFSK <b>RKTG</b> IMKKA | 0.27  |

**Supplemental Figure 8. Conservation of vertebrate SRF proteins at the SUMOylation sites.** SRF protein sequence comparison among Homo sapiens, Mus musculus, Rattus norvegicus, Canis lupus familiaris, and Gallus gallus. The potential SUMO motifs are marked in red and blue, indicating their high and moderate conservations among species, respectively.



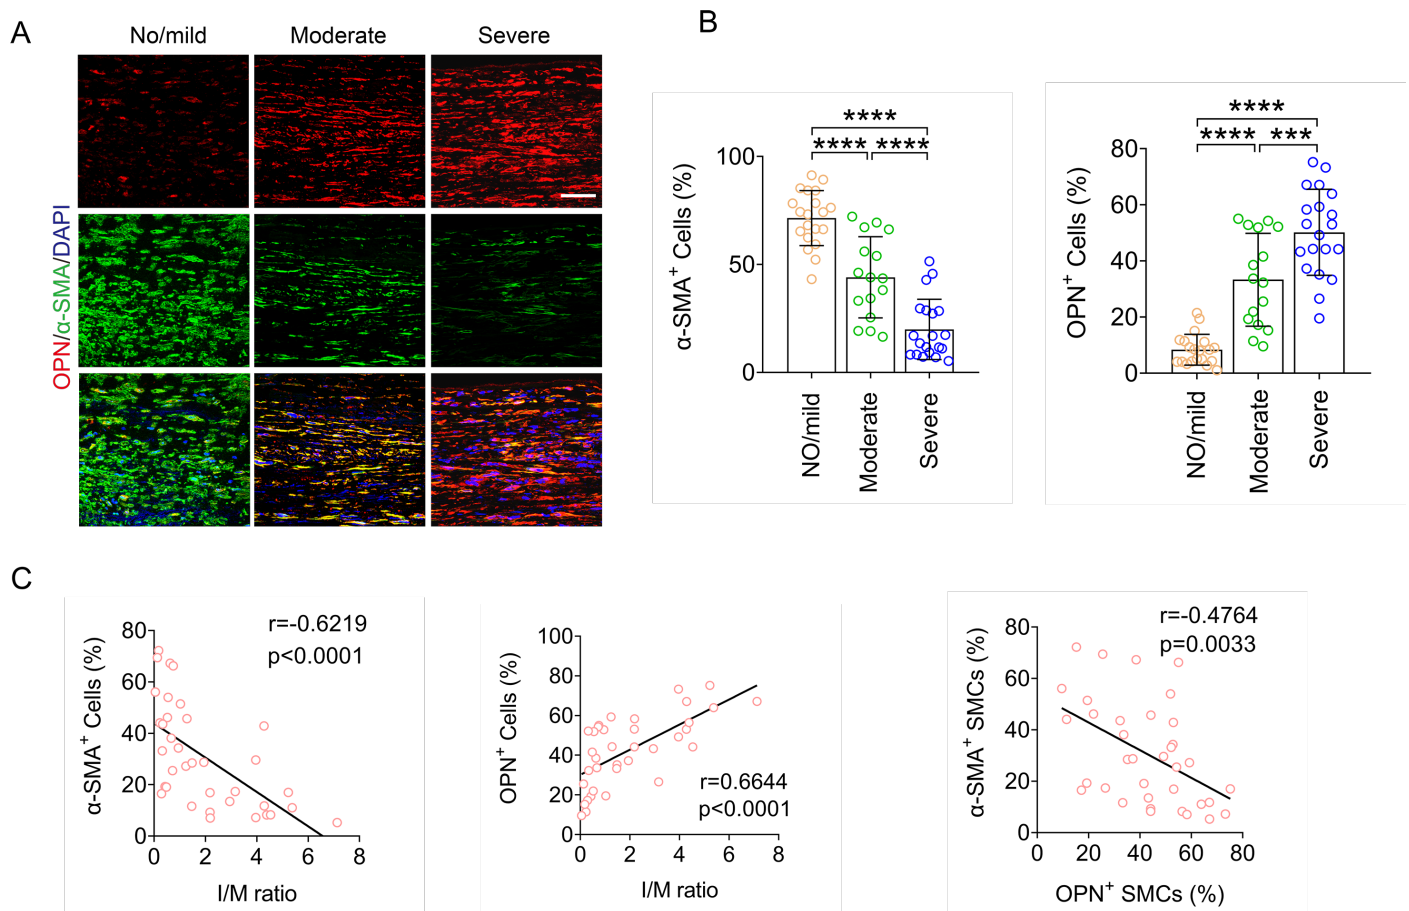

**Supplemental Figure 9. Correlations of α-SMA and OPN in VSMCs with neointimal formation in human specimens.** **A.** Immunocytochemical analysis of OPN and α-SMA expressions in the VSMCs of left main coronary arteries of patients with no/mild (n = 5), moderate (n = 4), and severe (n = 5) CAD. Five fields per section from each sample are analyzed. Representative images of immunofluorescence staining for α-SMA (green) and OPN (red). Nuclei were stained with DAPI (blue). Scale bar: 20 μm. Yellow indicates the co-localization of OPN with α-SMA and DAPI in the merged images. **B.** Quantitative analysis of α-SMA or OPN-positive cells in the lumen. Data are mean ± SEM. \*\*\* P < 0.001; \*\*\*\* P < 0.0001 (One-way ANOVA with Bonferroni post hoc analysis). **(C)** Scatter plots of I/M ratio, OPN and α-SMA. The corresponding Spearman's correlation coefficient (r) between I/M ratio, OPN and α-SMA, and the P value are shown. Data are mean ± SEM. \* P < 0.05; \*\* P < 0.01; \*\*\* P < 0.001; \*\*\*\* P < 0.0001, ns, no significance. Correlation analyses between variables were performed using the Pearson rank correlation test. P values were two-tailed and values <0.05 was considered statistically significant.

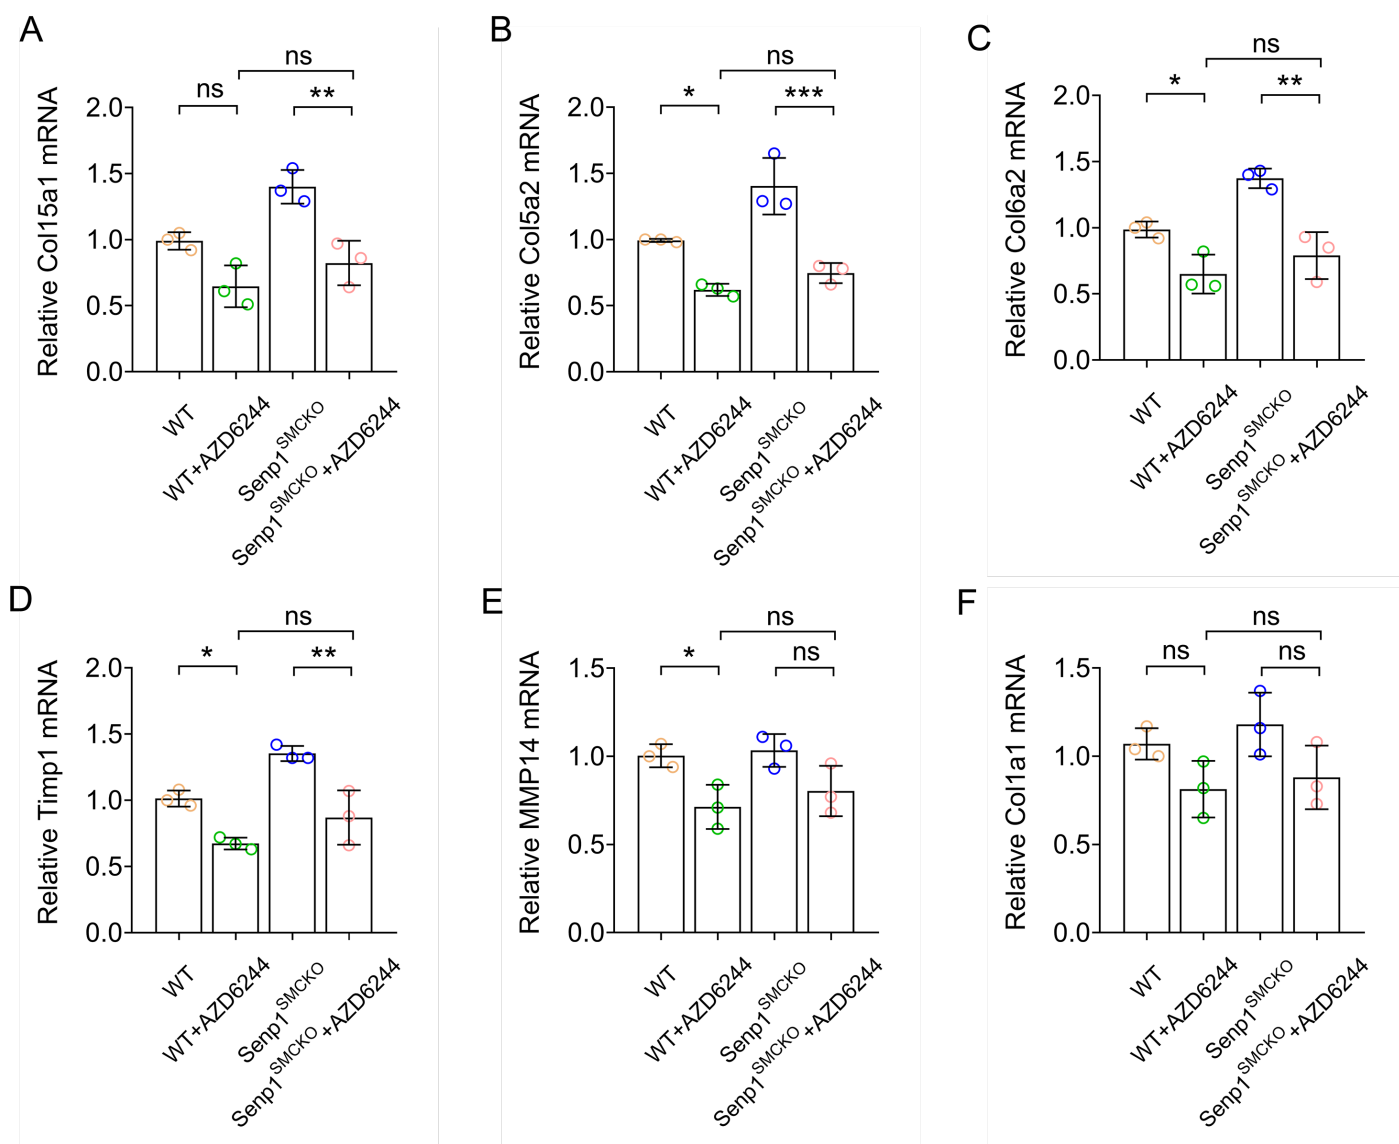

**Supplemental Fig. 10. The effect of AZD6244 on gene expression of ECM during vascular remodeling.**

**A-F.** Real-time PCR showing the mRNA levels of Col15a1 (**A**), Col5a2 (**B**), Col6a2 (**C**), Timp1 (**D**) and MMP14 (**E**) and Col1a1 (**F**) in carotid arteries of WT and *Senp1*<sup>SMCKO</sup> mice at 28 days after wire injury with or without AZD6244 treatment (n=3 per group). Gapdh served as the control. Data are mean  $\pm$  SEM. \*  $P < 0.05$ ; \*\*  $P < 0.01$ ; \*\*\*  $P < 0.001$ ; ns, no significance. One-way ANOVA with Bonferroni post hoc analysis.

Supplemental Fig.11: Uncut original gels

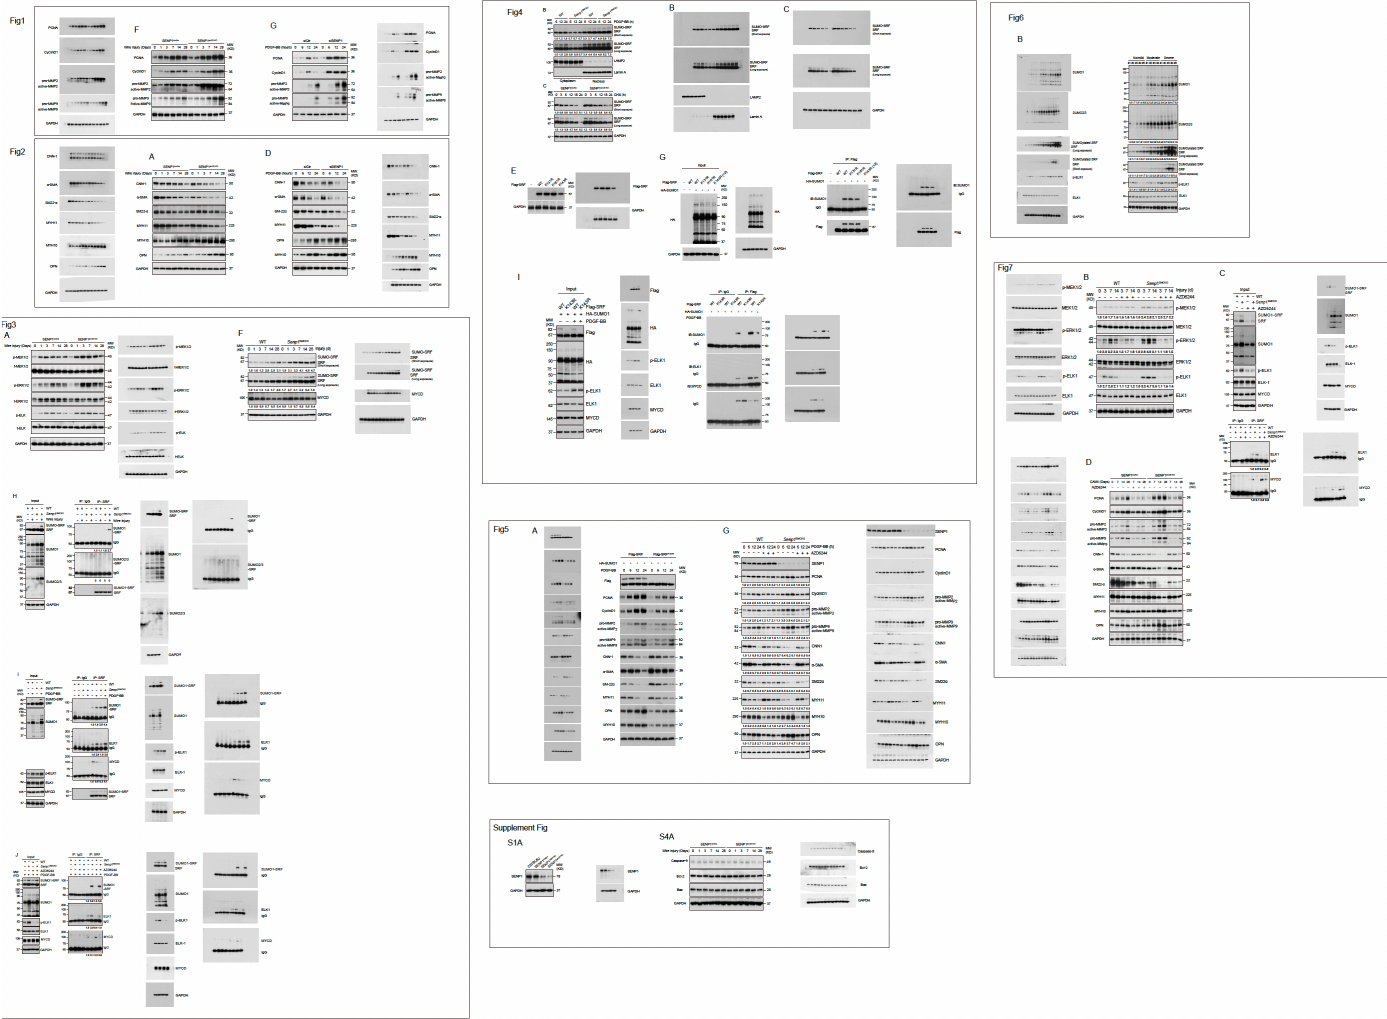

**Supplemental Table 1:** Demographic details of the human coronary arteries samples.

| Subject | Diagnosis              | Ages (years) | Gender |
|---------|------------------------|--------------|--------|
| 1       | trauma                 | 44           | Male   |
| 2       | trauma                 | 63           | Male   |
| 3       | trauma                 | 51           | Male   |
| 4       | trauma                 | 38           | Female |
| 5       | trauma                 | 55           | Male   |
| 6       | coronary heart disease | 71           | Male   |
| 7       | coronary heart disease | 67           | Male   |
| 8       | coronary heart disease | 66           | Female |
| 9       | coronary heart disease | 58           | Male   |
| 10      | coronary heart disease | 64           | Male   |
| 11      | coronary heart disease | 56           | Female |
| 12      | coronary heart disease | 74           | Male   |
| 12      | coronary heart disease | 68           | Male   |
| 14      | coronary heart disease | 76           | Male   |

**Supplemental Table 2.** List of RT-qPCR primers and sequences.

| Name              | Forward                              | Reverse                                |
|-------------------|--------------------------------------|----------------------------------------|
| m- $\alpha$ -SMA  | 5'-TGACCCAGATTATGTTGAGACCT-3'        | 5'-TCCAGAGTCCAGCACAATACCA-3'           |
| m-SM22 $\alpha$   | 5'-GTTCCAGACTGTTGACCTCTTTGA-3'       | 5'-TGTCTGTGAACCTCCCTCTTATGCT-3'        |
| m-CNN-1           | 5'-ACGACCACCAGCGTGAGCA-3'            | 5'-CTGGGTTGACTCATTGACTCATTGACCTTCTT-3' |
| m-MYH11           | 5'- TGAGCTCAGTGACAAGGTCCACAA -3'     | 5'- GGAAGCCACATCTTTGGCCAGTTT -3'       |
| m-MYH10           | 5'- CGACGCGTGCCAACGCATC -3'          | 5'- GACACAGTTGATCTTTCAGGAAGG -3'       |
| m-OPN             | 5'- GATGATGATGACGATGGAGACC -3'       | 5'- CGACTGTAGGGACGATTGGAG -3'          |
| m-SENP1           | 5'- CTGGGGAGGTGACCTTAGTGA -3'        | 5'- GTGATAATCTGGACGATAGGCTG -3'        |
| m-Col5a2          | 5'- GTGTCTGTGACAATGGTGCC -3'         | 5'- AGAGCCAGGCATGAGTCCTA -3'           |
| m-Col6a2          | 5'- GAGCGAGTCAACTCCCTGTC -3'         | 5'- CCATCCAGCAGGAAGACAAT -3'           |
| m-Col15a1         | 5'- CTGTCCACTTTCCGAGCCTTT -3'        | 5'- AAAGCACTTGGCCCTTGAGA -3'           |
| m-Col1a1          | 5'- GGCTGCACGAGTCACAC -3'            | 5'- TGGAGGGAGTTTACACGAAG -3'           |
| m-Timp1           | 5'- ACTCGGACCTGGTCATAAGGGC -3'       | 5'- TTCCGTGGCAGGCAAGCAAAGT -3'         |
| m-Mmp14           | 5'- CAAGGCCAATGTTTCGGAGGAAG -3'      | 5'- TCTCCATACTCGGAAGGCCTTC -3'         |
| m- $\beta$ -actin | 5'- GGCTGTATTCCCCTCCATCG -3'         | 5'- CCAGTTGGTAACAATGCCATGT -3'         |
| m-GAPDH           | 5'- CATGAGAAGTATGACAACAGCCT -3'      | 5'- AGTCCTTCCACGATACCAAAGT -3'         |
| m-SRF             | 5'- CCAGCGCTGTCAGCAGTGCCAAC -3'      | 5'- GCTGCTCCCAGCTTGCTGCCCTATC -3'      |
| m-SRF-K143R       | 5'- CGCGTGAAAGATCAGGATGGAGTTCATC -3' | 5'- GATGAACTCCATCCTGATCTTCACGCG -3'    |
| m-SRF-K131R       | 5'- GTGAGCGGGGCCAGGCCGGGAAGAAG -3'   | 5'- CTTCTTCCCCGGCCTGGCCCCGCTCAC -3'    |
| m-SRF-K135R       | 5'- GTGAGCGGGGCCAGGCCGGTAAGAAG -3'   | 5'- CTTCTTACCCGGCCTGGCCCCGCTCAC -3'    |
| m-SRF-K161R       | 5'- TTCAGCAAGAGGAGGACGGGCATCATG -3'  | 5'- CATGATGCCCGTCCTCCTTGTCTGAA -3'     |

**Supplemental Table 3:** Antibodies used in this study.

| Name              | CAS                         | Source | Dilution/IF                | Dilution/WB                                       |
|-------------------|-----------------------------|--------|----------------------------|---------------------------------------------------|
| $\alpha$ -SMA     | Sigma<br>F3777-2ML          | M      | 1:300/mouse<br>1:100/human |                                                   |
| $\alpha$ -SMA     | Invitrogen<br>14-9760-82    | M      |                            | 1:500/mouse                                       |
| SM-22 $\alpha$    | Abcam<br>ab10135            | G      | 1:50/mouse                 | 1:500/mouse                                       |
| MYH11             | Abcam<br>ab53219            | Rb     | 1:200/mouse                | 1:1000/mouse                                      |
| Calponin1 (CNN1)  | Abcam<br>ab46794            | Rb     | 1:200/mouse                | 1:500/mouse                                       |
| Osteopontin (OPN) | Abcam<br>ab8448             | Rb     | 1:200/human                |                                                   |
| Osteopontin (OPN) | Abcam<br>ab218237           | M      | 1:1000/mouse               | 1:1000/mouse                                      |
| MYH10             | Abcam<br>ab230823           | Rb     | 1:200/mouse                | 1:500/mouse                                       |
| MMP2              | Abcam<br>ab37150            | Rb     | 1:200/mouse                | 1:500/mouse                                       |
| MMP9              | Abcam<br>ab38898            | Rb     | 1:200/mouse                | 1:500/mouse                                       |
| SENP1             | Cell signaling<br>CST11929s | Rb     |                            | 1:1000/human                                      |
| SENP1             | Abcam<br>ab236094           | Rb     | 1:200/mouse                |                                                   |
| SENP1             | Life science<br>D2614000200 | Rb     |                            | 1:500/human                                       |
| SENP1             | Invitrogen<br>ZYMED383350   | Rb     | 1:200/human                | 1:500/mouse                                       |
| SENP1             | Santa cruz<br>sc271360      | M      |                            | 1:500/mouse                                       |
| SUMO1             | Cell signaling<br>CST4930s  | Rb     | 1:200/mouse<br>1:100/human |                                                   |
| SUMO1             | Santa cruz<br>sc5308        | M      |                            | 1:1000/mouse<br>1:500/human                       |
| SUMO2/3           | Santa cruz<br>sc393144      | M      | 1:200/mouse<br>1:100/human |                                                   |
| SRF               | Cell signaling<br>CST5147s  | Rb     | 1:200/mouse<br>1:100/human | 1:1000/mouse<br>1:500/human<br>1:50/mouse (Co-IP) |
| CyclinD1          | Cell signaling<br>CST2978   | Rb     |                            | 1:1000/mouse                                      |
| PCNA              | Cell signaling<br>CST13110  | Rb     |                            | 1:500/mouse                                       |
| Ki67              | Abcam<br>ab66155            | Rb     | 1:300/mouse                |                                                   |

|                        |                             |     |             |                              |
|------------------------|-----------------------------|-----|-------------|------------------------------|
| CD31                   | Millipore<br>MAB13982       | H   | 1:500/mouse |                              |
| CD31                   | R&D Systems<br>AF3628       | G   | 1:500/mouse |                              |
| Myocardin              | Sigma-Aldrich<br>SAB4200539 | Rb  |             | 1:500/mouse                  |
| p-MEK1/2               | Cell signaling<br>CST2338   | Rb  |             | 1:1000/mouse                 |
| MEK1/2                 | Cell signaling<br>CST8727   | Rb  |             | 1:1000/mouse                 |
| p-ELK1                 | Santa cruz<br>sc8406        | M   | 1:50/mouse  | 1:200/mouse                  |
| ELK1 (E-5)             | Santa cruz<br>sc365876      | M   |             | 1:500/mouse                  |
| p-ERK1/2               | Cell signaling<br>CST4370s  | Rb  |             | 1:1000/mouse                 |
| ERK1/2                 | Santa cruz<br>sc514302      | M   |             | 1:2000/mouse                 |
| p-NF-κB                | Cell signaling<br>CST3033s  | Rb  |             | 1:1000/mouse                 |
| NF-κB                  | Cell signaling<br>CST8242s  | Rb  |             | 1:1000/mouse                 |
| p-P38                  | Cell signaling<br>CST4511s  | Rb  |             | 1:1000/mouse                 |
| P38                    | Cell signaling<br>CST8690   | Rb  |             | 1:1000/mouse                 |
| HA-Tag                 | Cell signaling<br>CST3724   | Rb  | 1:300/mouse | 1:1000/mouse                 |
| DYKDDDDK Tag<br>(Flag) | Cell signaling<br>CST14793  | Rb  | 1:300/mouse | 1:2000/mouse                 |
| Cleaved caspase-3      | Cell signaling<br>CST9579T  | Rb  |             | 1:200/mouse                  |
| Caspase-9              | Cell signaling<br>CST9504   | Rb  |             | 1:500/mouse                  |
| Bcl-2                  | Cell signaling<br>CST15071  | M   |             | 1:1000/mouse                 |
| BAX                    | Cell signaling<br>CST14796  | Rb  |             | 1:500/mouse                  |
| GAPDH                  | Cell signaling<br>CST5174s  | Rb  |             | 1:5000/mouse<br>1:5000/human |
| LAMP2                  | Abcam<br>Ab13524            | Rat | 1:300       | 1:1000                       |
| KLF4                   | Abcam<br>Ab151733           | Rb  | 1:500       |                              |
|                        |                             |     |             |                              |
